# Supplementary material
Source: PubMed Central journal article supplement (PMC3888358)

Figure S1

Representative 3-nitrotyrosine staining after 1 hour of reperfusion in the cortex of post-ischemic kidneys in male (A) and female (B) SOD3<sup>-/-</sup> mice and male (C) and female (D) WT mice

#### Figure S2

- 5 Representative 8-OHdG staining after 1 hour of reperfusion in the cortex of post-ischemic kidneys of male (A) and female (B) SOD3<sup>-/-</sup> mice and male (C) and female (D) WT mice.

#### Table S1

##### Infiltration of post-ischemic kidneys by macrophages and T-cells

- 10 Infiltration of the cortex and medulla of post-ischemic kidneys after 24 hours of reperfusion with macrophages (F4/80+) and T-cells (CD3+) in male WT (n=6) and SOD3<sup>-/-</sup> (n=8) mice and female WT (n=6) and SOD3<sup>-/-</sup> (n=9) mice

Table S1

|                                            |         | <b>Male WT</b> | <b>Male SOD3<sup>-/-</sup></b> | <b>Female WT</b> | <b>Female SOD3<sup>-/-</sup></b> |
|--------------------------------------------|---------|----------------|--------------------------------|------------------|----------------------------------|
| Macrophages<br>[F4/80+/40mm <sup>2</sup> ] | Cortex  | 54±6           | 46±7                           | 37±5             | 38±7                             |
|                                            | Medulla | 11±3           | 9±2                            | 9±1              | 10±2                             |
| T-Cells<br>[CD3+/40mm <sup>2</sup> ]       | Cortex  | 26±6           | 29±4                           | 24±2             | 33±2                             |
|                                            | Medulla | 16±1           | 22±4                           | 15±2             | 19±1                             |

Figure S1

**A Male KO kidneys**

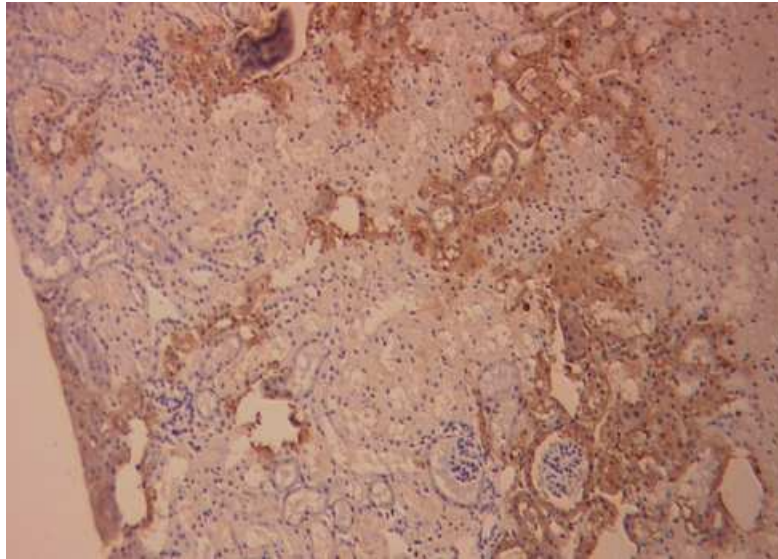

**B Female KO kidneys**

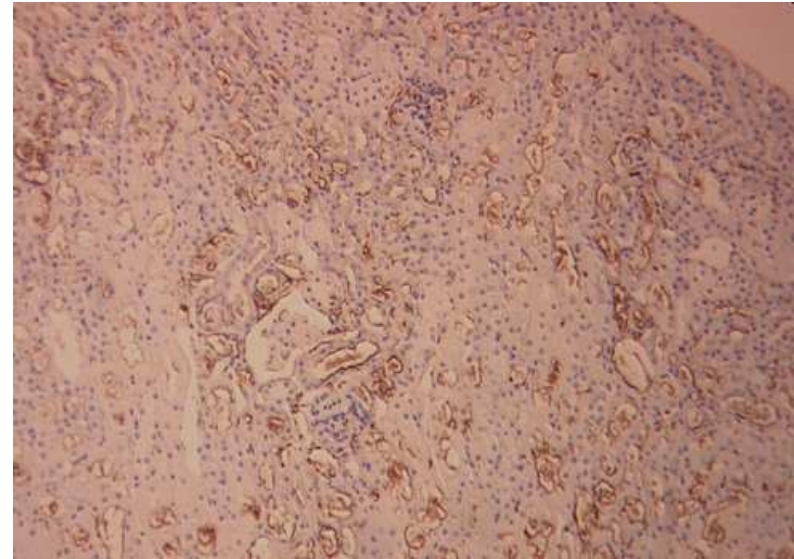

**C Male WT kidneys**

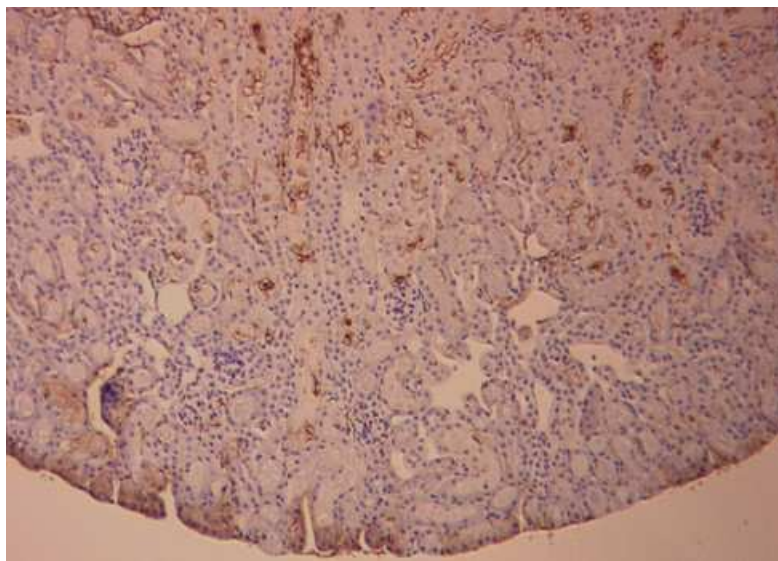

**D Female WT kidneys**

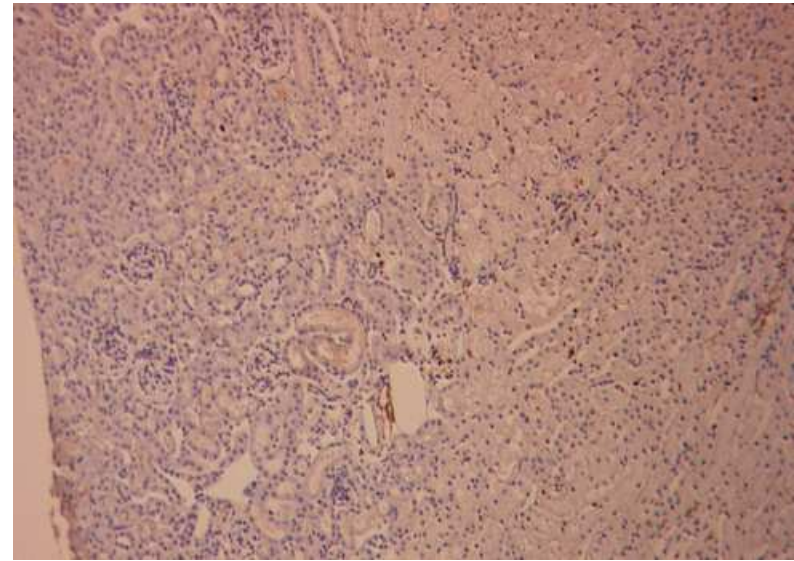

Figure S2

**A Male KO kidneys**

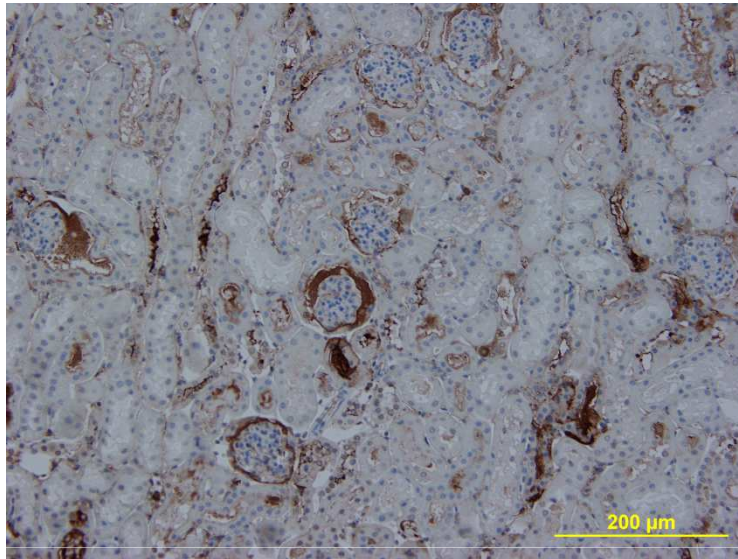

**B Female KO kidneys**

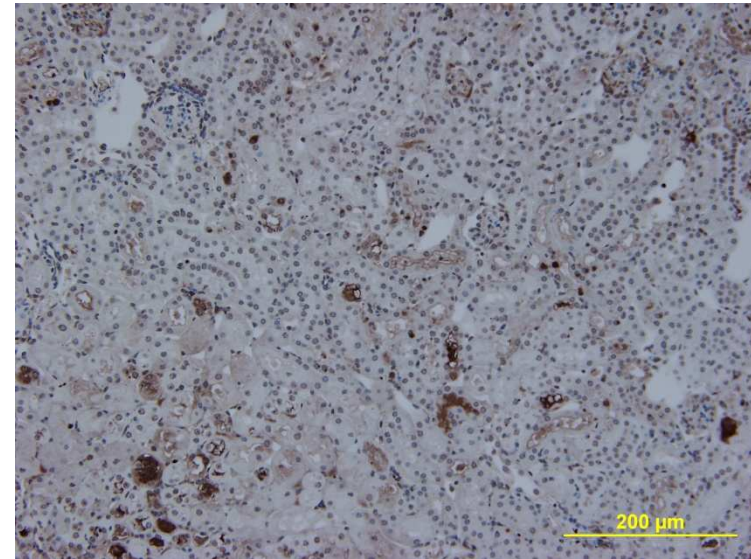

**C Male WT kidneys**

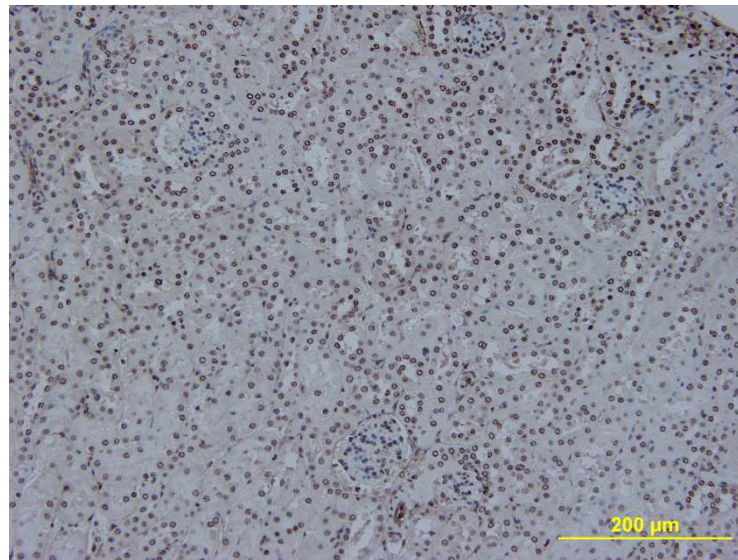

**D Female WT kidneys**

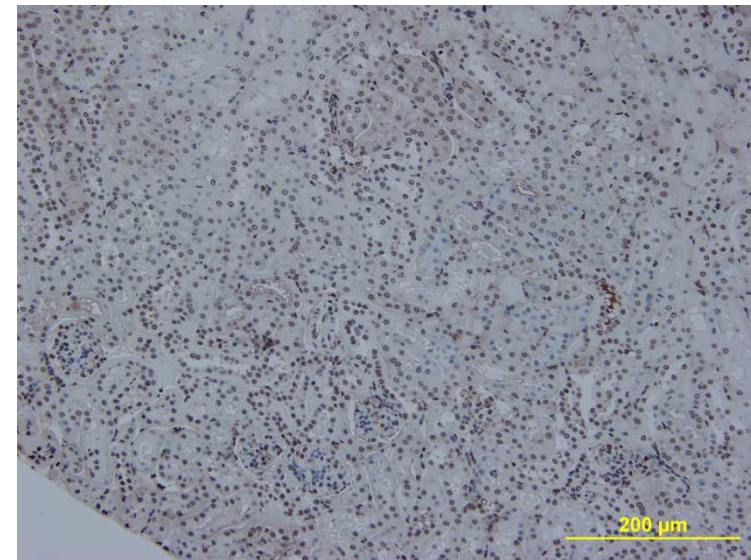

Supplement: NIHMS519798-supplement-01.pdf [file NIHMS519798-supplement-01.pdf]
